# Supplementary material
Source: PubMed Central journal article supplement (PMC10023390)

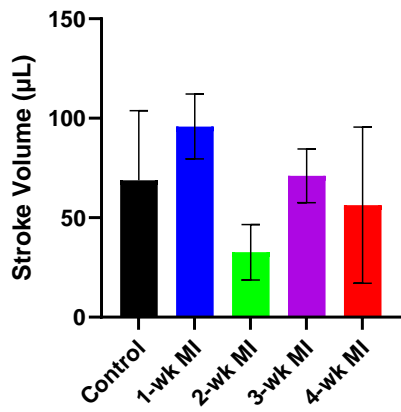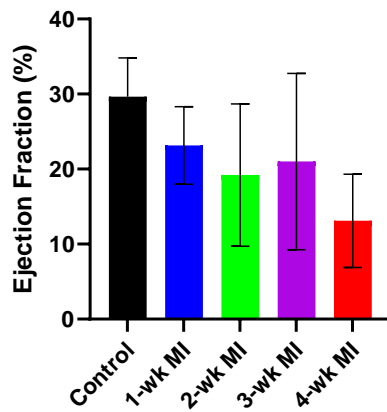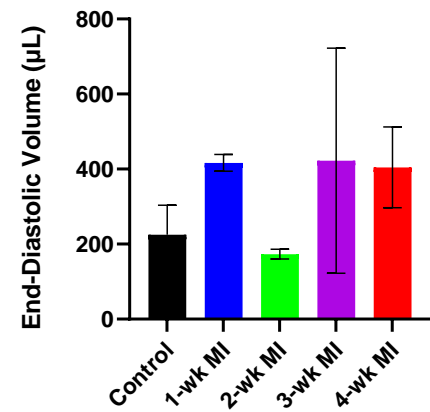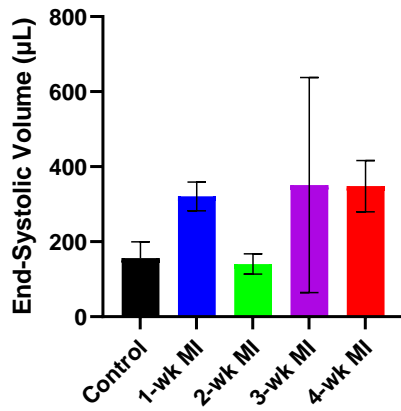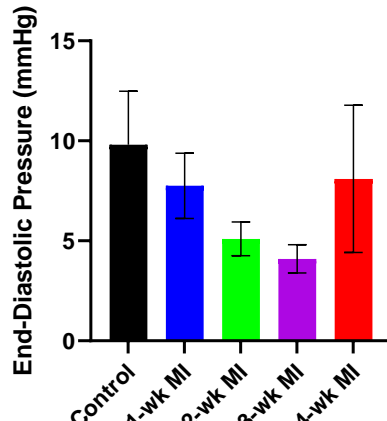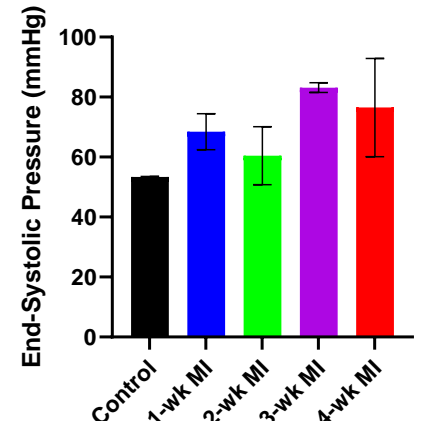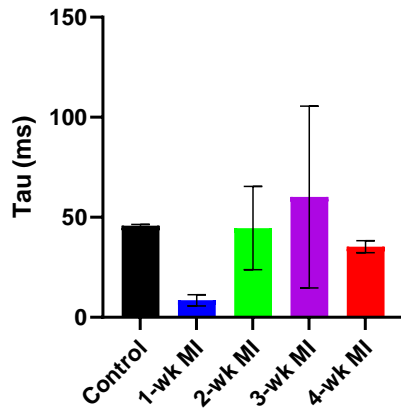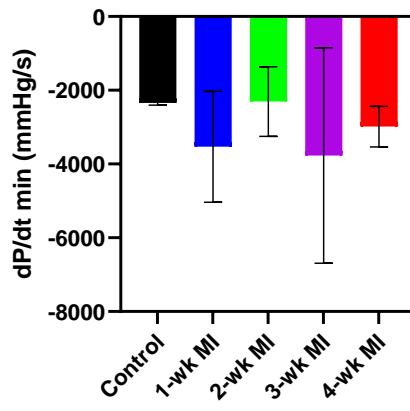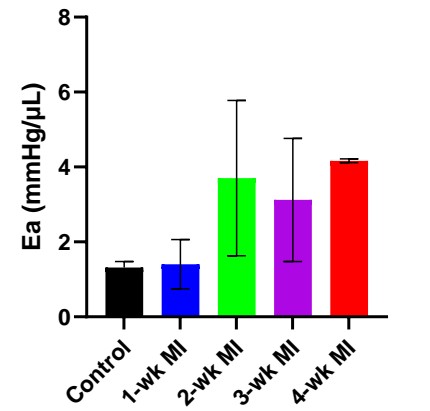

Supplement: NIHMS1863735-supplement-SupplementaryFig2.pdf [file NIHMS1863735-supplement-SupplementaryFig2.pdf]

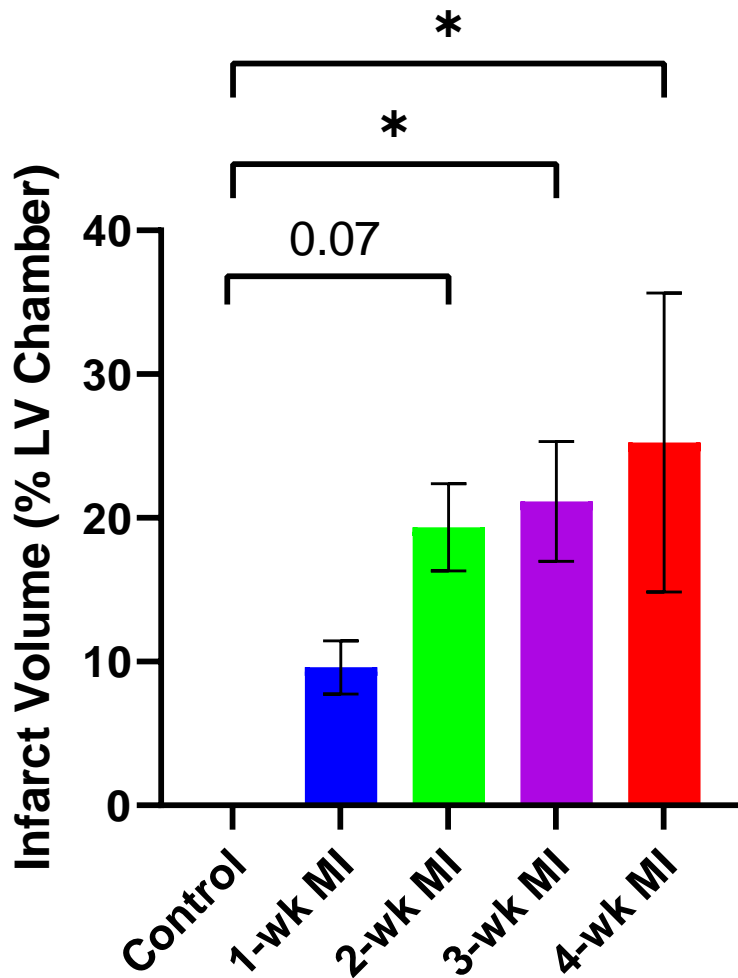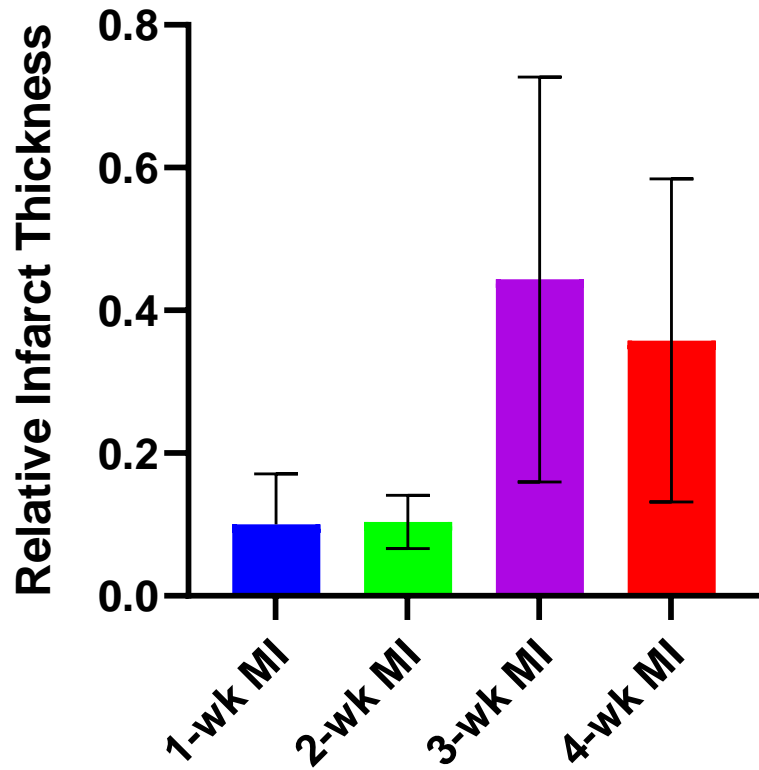

Supplement: NIHMS1863735-supplement-SupplementaryFig3.pdf [file NIHMS1863735-supplement-SupplementaryFig3.pdf]

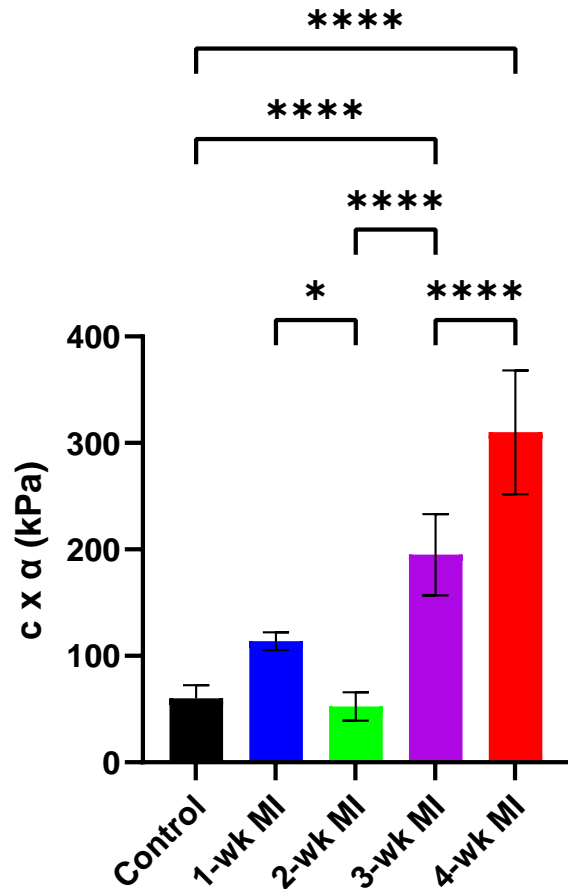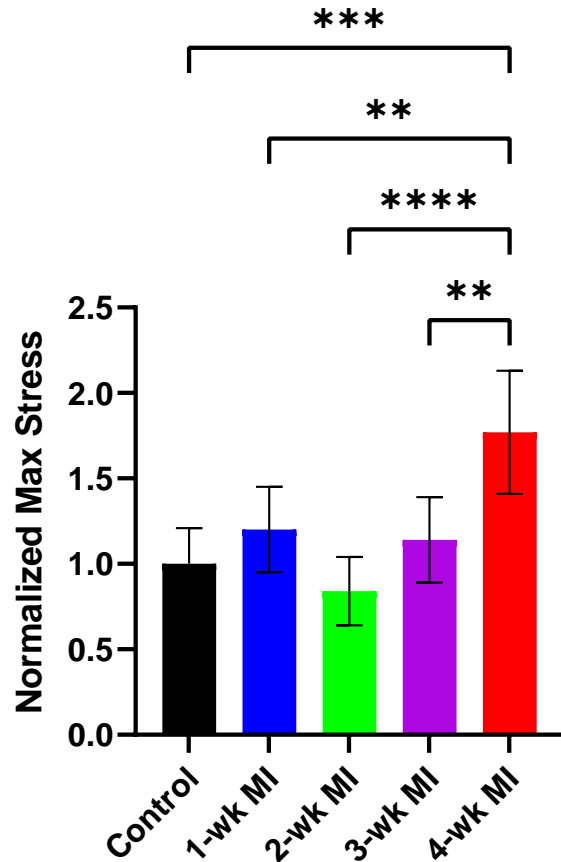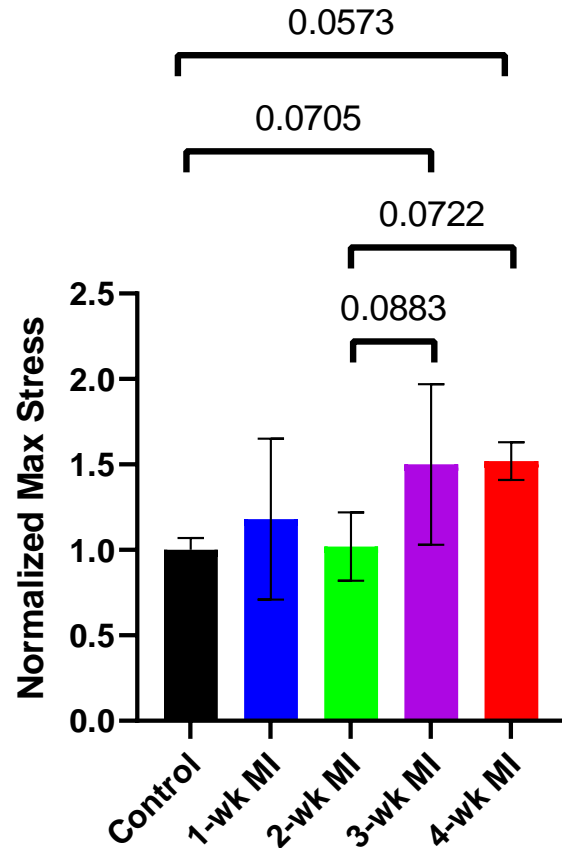

Supplement: NIHMS1863735-supplement-SupplementaryFig4.pdf [file NIHMS1863735-supplement-SupplementaryFig4.pdf]
